# Supplementary material for: Opto-electronic multifunctional chiral diamondoid-network coordination polymer: bis{4-[2-(4-pyridyl)ethenyl]benzoato}zinc with high thermal stability
Source: Royal Society of Chemistry journal article supplement (doi:10.1039/b004980h), 2000-01-01
Supplement: b004980h.doc [file b004980h.doc]

## *SHG measurements* for 1: the second order nonlinear optical intensity was estimated by measuring a powder sample of 80–150 μm diameter in the form of a pellet (Kurtz powder test), relative to that of urea. A pulse Q-switched Nd:YAG laser at a wavelength of 1064 nm was used to generate the SHG signal from the sample. The backward scattered SHG light was collected using a spherical concave mirror and passed through a filter which transmits only 532 nm radiation. It is estimated that the SHG efficiency of 1 is slightly stronger than that of urea (*ca.* 1.5×).
