# Supplementary figures and images for: Opto-electronic multifunctional chiral diamondoid-network coordination polymer: bis{4-[2-(4-pyridyl)ethenyl]benzoato}zinc with high thermal stability
Source: Royal Society of Chemistry journal article supplement (doi:10.1039/b004980h), 2000-01-01

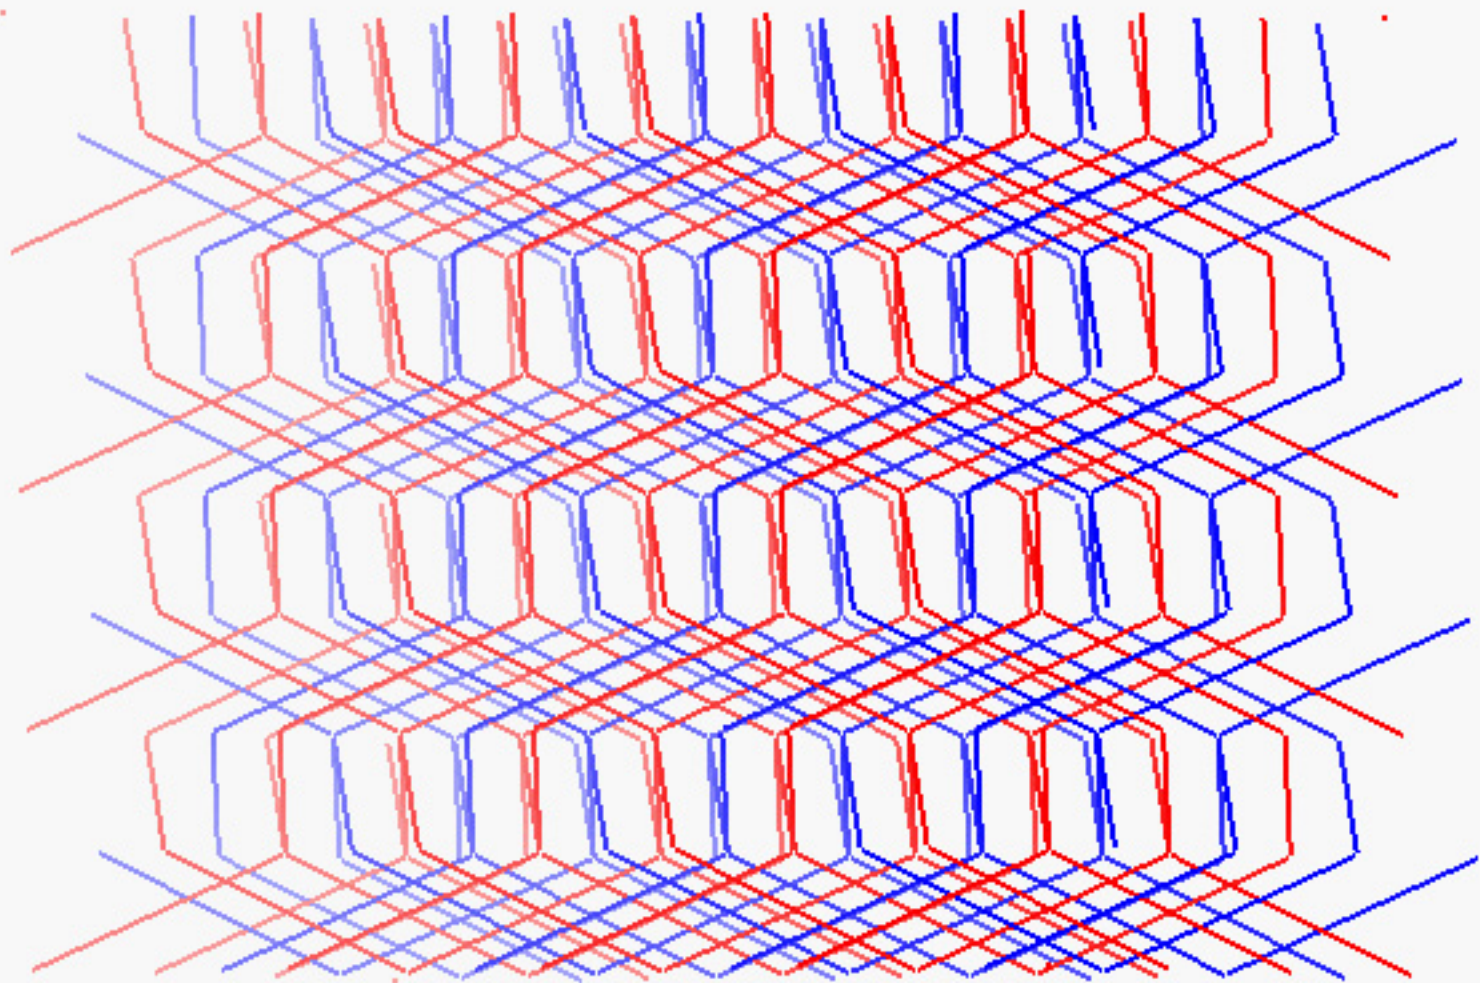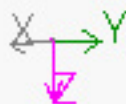

Supplement: b004980h.pdf [file b004980h.pdf]
